# Supplementary material
Source: PubMed Central journal article supplement (PMC8786428)
Supplement: Kiran.pdf [file Kiran.pdf]

## Supplemental materials for

Kiran T, Moineddin R, Kopp A, Glazier RH. Impact of team-based care on emergency department use. *Ann Fam Med*. 2022;20(1):24-31.

### Supplemental Tables and Figures

**Supplemental Figure 1.** Selection of patients whose physician transitioned to team-based capitation and patients whose physician transitioned to non-team capitation between 2007 and 2013, Ontario, Canada.

**Supplemental Table 1.** Select characteristics of patients whose physician transitioned to team-based capitation and matched patients whose physician transitioned to non-team capitation between 2007 and 2013, stratified by rurality, Ontario, Canada.

**Supplemental Figure 2.** Details on the negative binomial regression modeling

**Supplemental Table 2.** Number of Ontario residents included in denominator by year for the unmatched and matched analysis

**Supplemental Table 3.** Change in emergency department visit rate after transition to capitation, team-based versus non-team for matched data, 2007 – 2013, stratified by rurality, Ontario, Canada.

**Supplemental Figure 3.** Mean emergency department visit rate before and after transition to a capitation-based primary care model between 2007 - 2013, with a team or without a team for matched data, stratified by rurality, Ontario, Canada.

**Supplemental Figure 1.** Selection of patients whose physician transitioned to team-based capitation and patients whose physician transitioned to non-team capitation between 2007 and 2013, Ontario, Canada.

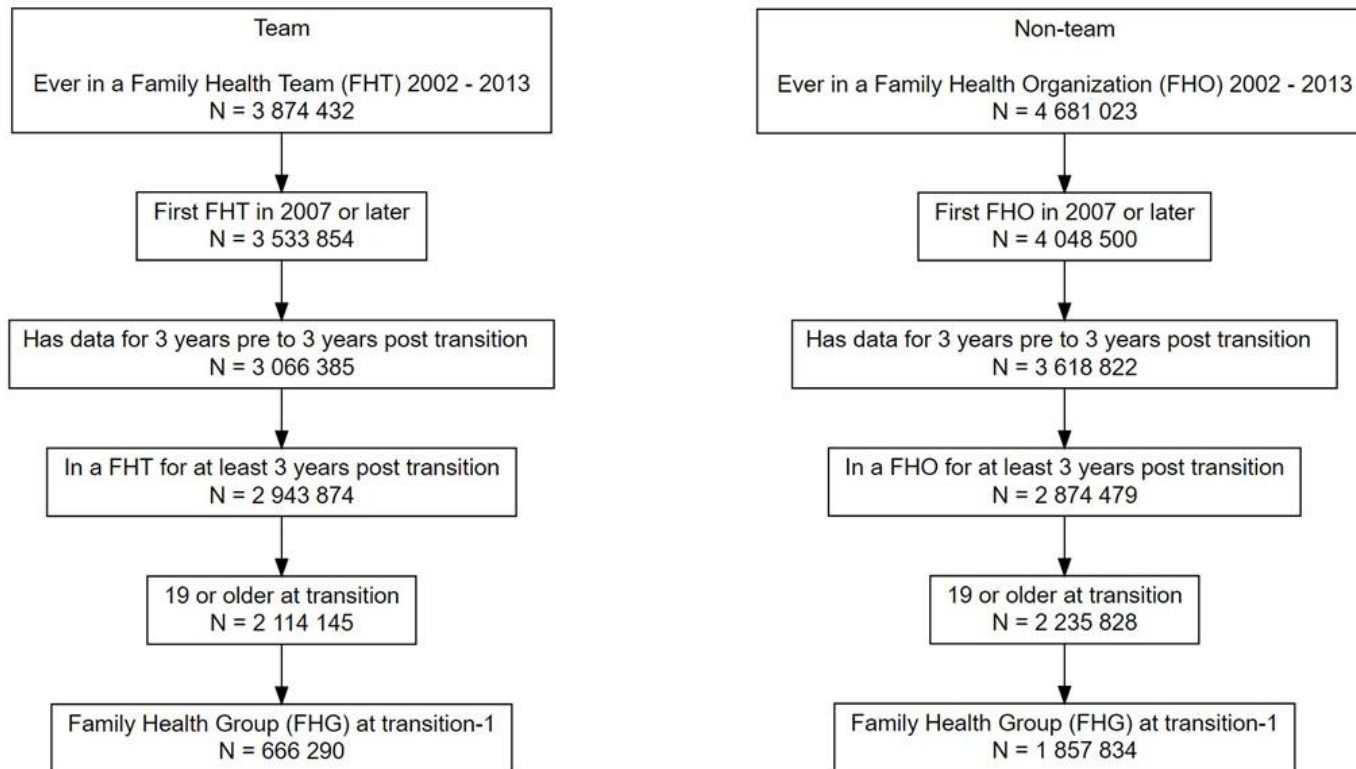

**Supplemental Table 1.** Select characteristics of patients whose physician transitioned to team-based capitation and matched patients whose physician transitioned to non-team capitation between 2007 and 2013, stratified by rurality, Ontario, Canada.

|                             | <b>Total</b>   | <b>Big cities</b> |                 | <b>Small Towns</b> |                 | <b>Rural</b>  |                 |
|-----------------------------|----------------|-------------------|-----------------|--------------------|-----------------|---------------|-----------------|
|                             |                | <b>Team</b>       | <b>Non-team</b> | <b>Team</b>        | <b>Non-team</b> | <b>Team</b>   | <b>Non-team</b> |
| No. of patients             | 486,528        | 182,437           | 182,437         | 51,645             | 51,645          | 9,182         | 9,182           |
| Age, mean (SD)              | 47.53 (17.27)  | 46.97 (17.32)     | 46.97 (17.32)   | 48.96 (17.01)      | 48.96 (17.01)   | 50.64 (17.09) | 50.63 (17.09)   |
| Age group, no. (%)          |                |                   |                 |                    |                 |               |                 |
| < 19                        | 89 (0.0)       | 0 (0.0)           | 45 (0.0)        | 0 (0.0)            | 28 (0.1)        | 0 (0.0)       | 15 (0.2)        |
| 19 – 44                     | 222,701 (45.8) | 87,152 (47.8)     | 87,105 (47.7)   | 20,988 (40.6)      | 20,962 (40.6)   | 3,255 (35.4)  | 3,239 (35.3)    |
| 45 – 64                     | 176,586 (36.3) | 63,702 (34.9)     | 63,703 (34.9)   | 20,715 (40.1)      | 20,711 (40.1)   | 3,879 (42.2)  | 3,876 (42.2)    |
| 65+                         | 87,152 (17.9)  | 31,583 (17.3)     | 31,583 (17.3)   | 9,942 (19.3)       | 9,944 (19.3)    | 2,048 (22.3)  | 2,052 (22.3)    |
| Female (n, %)               | 278,366 (57.2) | 105,390 (57.8)    | 105,390 (57.8)  | 28,622 (55.4)      | 28,622 (55.4)   | 5,171 (56.3)  | 5,171 (56.3)    |
| Morbidity, no. (%), RUB     |                |                   |                 |                    |                 |               |                 |
| 0 (none)                    | 14,673 (3.0)   | 4,408 (2.4)       | 6,252 (3.4)     | 1,732 (3.4)        | 1,722 (3.3)     | 234 (2.5)     | 325 (3.5)       |
| 1                           | 21,757 (4.5)   | 7,558 (4.1)       | 8,621 (4.7)     | 2,344 (4.5)        | 2,445 (4.7)     | 346 (3.8)     | 443 (4.8)       |
| 2                           | 75,523 (15.5)  | 27,554 (15.1)     | 29,054 (15.9)   | 7,999 (15.5)       | 8,114 (15.7)    | 1,353 (14.7)  | 1,449 (15.8)    |
| 3                           | 270,636 (55.6) | 101,315 (55.5)    | 102,061 (55.9)  | 28,098 (54.4)      | 28,889 (55.9)   | 5,106 (55.6)  | 5,167 (56.3)    |
| 4                           | 80,261 (16.5)  | 31,917 (17.5)     | 28,747 (15.8)   | 8,598 (16.6)       | 8,055 (15.6)    | 1,599 (17.4)  | 1,345 (14.6)    |
| 5 (high)                    | 23,678 (4.9)   | 9,685 (5.3)       | 7,702 (4.2)     | 2,874 (5.6)        | 2,420 (4.7)     | 544 (5.9)     | 453 (4.9)       |
| Co-morbidity, no. (%), ADGs |                |                   |                 |                    |                 |               |                 |
| No utilization              | 14,674 (3.0)   | 4,409 (2.4)       | 6,252 (3.4)     | 1,732 (3.4)        | 1,722 (3.3)     | 234 (2.5)     | 325 (3.5)       |
| 1 – 4 (low co-morbidity)    | 195,709 (40.2) | 71,222 (39.0)     | 72,956 (40.0)   | 22,195 (43.0)      | 21,363 (41.4)   | 3,902 (42.5)  | 4,071 (44.3)    |

|                                          |                |               |               |               |               |              |              |
|------------------------------------------|----------------|---------------|---------------|---------------|---------------|--------------|--------------|
| 5 - 9                                    | 222,390 (45.7) | 84,867 (46.5) | 83,576 (45.8) | 22,563 (43.7) | 23,237 (45.0) | 4,113 (44.8) | 4,034 (43.9) |
| 10+ (high co-morbidity)                  | 53,755 (11.0)  | 21,939 (12.0) | 19,653 (10.8) | 5,155 (10.0)  | 5,323 (10.3)  | 933 (10.2)   | 752 (8.2)    |
| <hr/>                                    |                |               |               |               |               |              |              |
| Recent resident (last 10 years), no. (%) | 33,661 (6.9)   | 16,153 (8.9)  | 14,913 (8.2)  | 1,215 (2.4)   | 995 (1.9)     | 198 (2.2)    | 187 (2.0)    |
| <hr/>                                    |                |               |               |               |               |              |              |
| Income quintile (Q), no. (%)             |                |               |               |               |               |              |              |
| Q1 (lowest)                              | 78,274 (16.1)  | 32,898 (18.0) | 28,849 (15.8) | 7,807 (15.1)  | 5,099 (9.9)   | 2,000 (21.8) | 1,621 (17.7) |
| Q2                                       | 85,524 (17.6)  | 33,297 (18.3) | 31,764 (17.4) | 9,112 (17.6)  | 7,087 (13.7)  | 2,332 (25.4) | 1,932 (21.0) |
| Q3                                       | 92,632 (19.0)  | 34,033 (18.7) | 33,577 (18.4) | 11,394 (22.1) | 9,899 (19.2)  | 1,939 (21.1) | 1,790 (19.5) |
| Q4                                       | 109,653 (22.5) | 39,964 (21.9) | 39,535 (21.7) | 12,470 (24.1) | 14,333 (27.8) | 1,460 (15.9) | 1,891 (20.6) |
| Q5 (highest)                             | 118,987 (24.5) | 41,754 (22.9) | 48,276 (26.5) | 10,735 (20.8) | 15,165 (29.4) | 1,211 (13.2) | 1,846 (20.1) |
| Missing                                  | 1,458 (0.3)    | 491 (0.3)     | 436 (0.2)     | 127 (0.2)     | 62 (0.1)      | 240 (2.6)    | 102 (1.1)    |
| <hr/>                                    |                |               |               |               |               |              |              |
| Year of transition, no. (%)              |                |               |               |               |               |              |              |
| 2007                                     | 212 (0.0)      | 74 (0.0)      | 74 (0.0)      | 22 (0.0)      | 22 (0.0)      | 10 (0.1)     | 10 (0.1)     |
| 2008                                     | 59,040 (12.1)  | 19,356 (10.6) | 19,356 (10.6) | 8,311 (16.1)  | 8,311 (16.1)  | 1,853 (20.2) | 1,853 (20.2) |
| 2009                                     | 164,836 (33.9) | 56,087 (30.7) | 56,087 (30.7) | 22,989 (44.5) | 22,989 (44.5) | 3,342 (36.4) | 3,342 (36.4) |
| 2010                                     | 99,364 (20.4)  | 37,504 (20.6) | 37,504 (20.6) | 9,785 (18.9)  | 9,785 (18.9)  | 2,393 (26.1) | 2,393 (26.1) |
| 2011                                     | 57,296 (11.8)  | 23,279 (12.8) | 23,279 (12.8) | 4,673 (9.0)   | 4,673 (9.0)   | 696 (7.6)    | 696 (7.6)    |
| 2012                                     | 73,996 (15.2)  | 32,245 (17.7) | 32,245 (17.7) | 4,159 (8.1)   | 4,159 (8.1)   | 594 (6.5)    | 594 (6.5)    |
| 2013                                     | 31,784 (6.5)   | 13,892 (7.6)  | 13,892 (7.6)  | 1,706 (3.3)   | 1,706 (3.3)   | 294 (3.2)    | 294 (3.2)    |
| <hr/>                                    |                |               |               |               |               |              |              |

**Supplemental Figure 2.** Details on the negative binomial regression modeling

We used a negative binomial regression model fitted to the number of ED visits adjusted for age and sex. Year (-6, -5, ..., 6) was included as a categorical variable and serial correlation among the repeated observations of individuals was modelled as an AR(1) model. The adjusted/expected rate of ED visits for each year was calculated using the fitted negative binomial regression.

The distribution of annual number of ED visits were similar over the study period. To make sure that the distribution of the ED visits followed a Negative Binomial, we fitted a negative binomial distribution to the number of ED visits and calculated the expected probability for the number of ED visits. We plotted the observed and predicted probabilities to assess the goodness of fit. The predicted and observed probability of zero were very close.

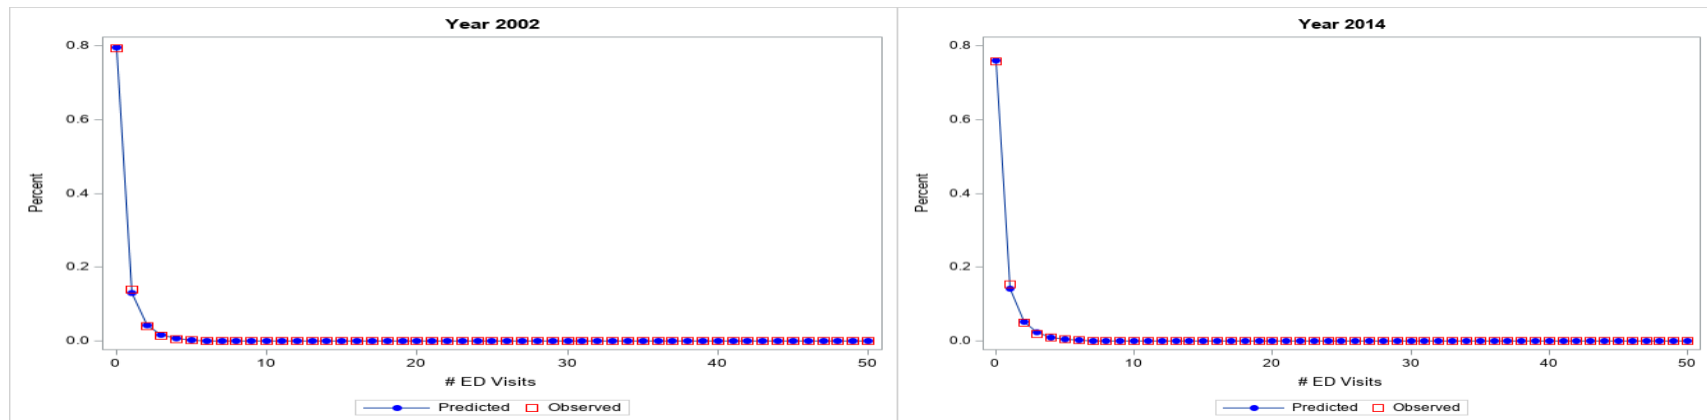

**Supplemental Table 2.** Number of Ontario residents included in denominator by year for the unmatched and matched analysis

| Rurality    | Status   | Index year | Denominator    |              |
|-------------|----------|------------|----------------|--------------|
|             |          |            | Unmatched Data | Matched Data |
| Big cities  | Non-team | -6         | 1683290        | 182411       |
|             |          | -5         | 1683998        | 182485       |
|             |          | -4         | 1683998        | 182485       |
|             |          | -3         | 1683998        | 182485       |
|             |          | -2         | 1683998        | 182485       |
|             |          | -1         | 1683998        | 182485       |
|             |          | 0          | 1683998        | 182485       |
|             |          | 1          | 1683998        | 182485       |
|             |          | 2          | 1683998        | 182485       |
|             |          | 3          | 1593733        | 168616       |
|             |          | 4          | 1335677        | 136402       |
|             |          | 5          | 1004607        | 113130       |
|             | 6        | 655455     | 75626          |              |
|             | Team     | -6         | 330030         | 182286       |
|             |          | -5         | 386509         | 182381       |
|             |          | -4         | 386509         | 182381       |
|             |          | -3         | 386509         | 182381       |
|             |          | -2         | 386509         | 182381       |
|             |          | -1         | 386509         | 182381       |
|             |          | 0          | 386509         | 182381       |
|             |          | 1          | 386509         | 182381       |
|             |          | 2          | 386509         | 182381       |
|             |          | 3          | 363928         | 168587       |
|             |          | 4          | 309253         | 136360       |
| 5           |          | 276217     | 113081         |              |
| Small towns | Non-team | 6          | 227643         | 75577        |
|             |          | -6         | 475728         | 51634        |
|             |          | -5         | 475980         | 51656        |

|              |                 |    |        |       |
|--------------|-----------------|----|--------|-------|
|              |                 | -4 | 475980 | 51656 |
|              |                 | -3 | 475980 | 51656 |
|              |                 | -2 | 475980 | 51656 |
|              |                 | -1 | 475980 | 51656 |
|              |                 | 0  | 475980 | 51656 |
|              |                 | 1  | 475980 | 51656 |
|              |                 | 2  | 475980 | 51656 |
|              |                 | 3  | 464866 | 49955 |
|              |                 | 4  | 430048 | 45802 |
|              |                 | 5  | 373292 | 41132 |
|              |                 | 6  | 273763 | 31347 |
|              | <b>Team</b>     | -6 | 158244 | 51608 |
|              |                 | -5 | 212858 | 51638 |
|              |                 | -4 | 212858 | 51638 |
|              |                 | -3 | 212858 | 51638 |
|              |                 | -2 | 212858 | 51638 |
|              |                 | -1 | 212858 | 51638 |
|              |                 | 0  | 212858 | 51638 |
|              |                 | 1  | 212858 | 51638 |
|              |                 | 2  | 212858 | 51638 |
|              |                 | 3  | 206180 | 49948 |
|              |                 | 4  | 184517 | 45793 |
|              |                 | 5  | 153665 | 41120 |
|              |                 | 6  | 131293 | 31335 |
| <b>Rural</b> | <b>Non-team</b> | -6 | 92637  | 9033  |
|              |                 | -5 | 92685  | 9043  |
|              |                 | -4 | 92685  | 9043  |
|              |                 | -3 | 92685  | 9043  |
|              |                 | -2 | 92685  | 9043  |
|              |                 | -1 | 92685  | 9043  |
|              |                 | 0  | 92685  | 9043  |
|              |                 | 1  | 92685  | 9043  |

|             |    |       |      |
|-------------|----|-------|------|
|             | 2  | 92685 | 9043 |
|             | 3  | 90409 | 8760 |
|             | 4  | 87009 | 8189 |
|             | 5  | 82744 | 7511 |
|             | 6  | 62044 | 5142 |
| <b>Team</b> | -6 | 41360 | 9030 |
|             | -5 | 63811 | 9043 |
|             | -4 | 63811 | 9043 |
|             | -3 | 63811 | 9043 |
|             | -2 | 63811 | 9043 |
|             | -1 | 63811 | 9043 |
|             | 0  | 63811 | 9043 |
|             | 1  | 63811 | 9043 |
|             | 2  | 63811 | 9043 |
|             | 3  | 61313 | 8761 |
|             | 4  | 53003 | 8189 |
|             | 5  | 45057 | 7511 |
|             | 6  | 40820 | 5142 |

---



**Supplemental Table 3.** Change in emergency department visit rate after transition to capitation, team-based versus non-team for matched data, 2007 – 2013, stratified by rurality, Ontario, Canada.

| Emergency department visit rate % (95% CI)                              |                   |                     |                    |                   |                     |                   |
|-------------------------------------------------------------------------|-------------------|---------------------|--------------------|-------------------|---------------------|-------------------|
|                                                                         | Big cities        |                     | Small town         |                   | Rural               |                   |
|                                                                         | Team              | Non-team            | Team               | Non-team          | Team                | Non-team          |
| Trend before                                                            | 3.86 (3.51, 4.21) | 2.95 (2.6, 3.29)    | 3.23 (2.77, 3.70)  | 3.32 (2.81, 3.83) | 6.41 (5.16, 7.67)   | 1.73 (0.52, 2.96) |
| Level change                                                            | 3.32 (1.85, 4.83) | -0.36 (-1.78, 1.15) | 2.08 (0.02, 4.19)  | 0.6 (-1.59, 2.84) | 11.39 (6.24, 16.81) | 2.28 (-3.05, 7.9) |
| Trend after                                                             | 0.63 (0.31, 0.95) | 2.65 (2.32, 2.98)   | -0.7 (-1.09, 0.29) | 0.82 (0.36, 1.29) | -2.85 (-3.73, 1.94) | 0.45 (-0.4, 1.34) |
| Difference in rate of increase after transition (Non-team minus team) % | 2.02              |                     | 1.53               |                   | 3.30                |                   |
| p-value                                                                 | <0.0001           |                     | 0.0003             |                   | 0.0285              |                   |

**Notes:** ED, emergency department; Non-team patients were matched to team patients based on Local Health Integration Network, Rurality Index for Ontario, age, sex, year of transition; age matching was done using increasing increments (first match if exact, then 10 days, then 100 days, then 365 days).

**Supplemental Figure 3.** Mean emergency department visit rate before and after transition to a capitation-based primary care model, between 2007 and 2013, with a team or without a team for matched data, stratified by rurality, Ontario, Canada.

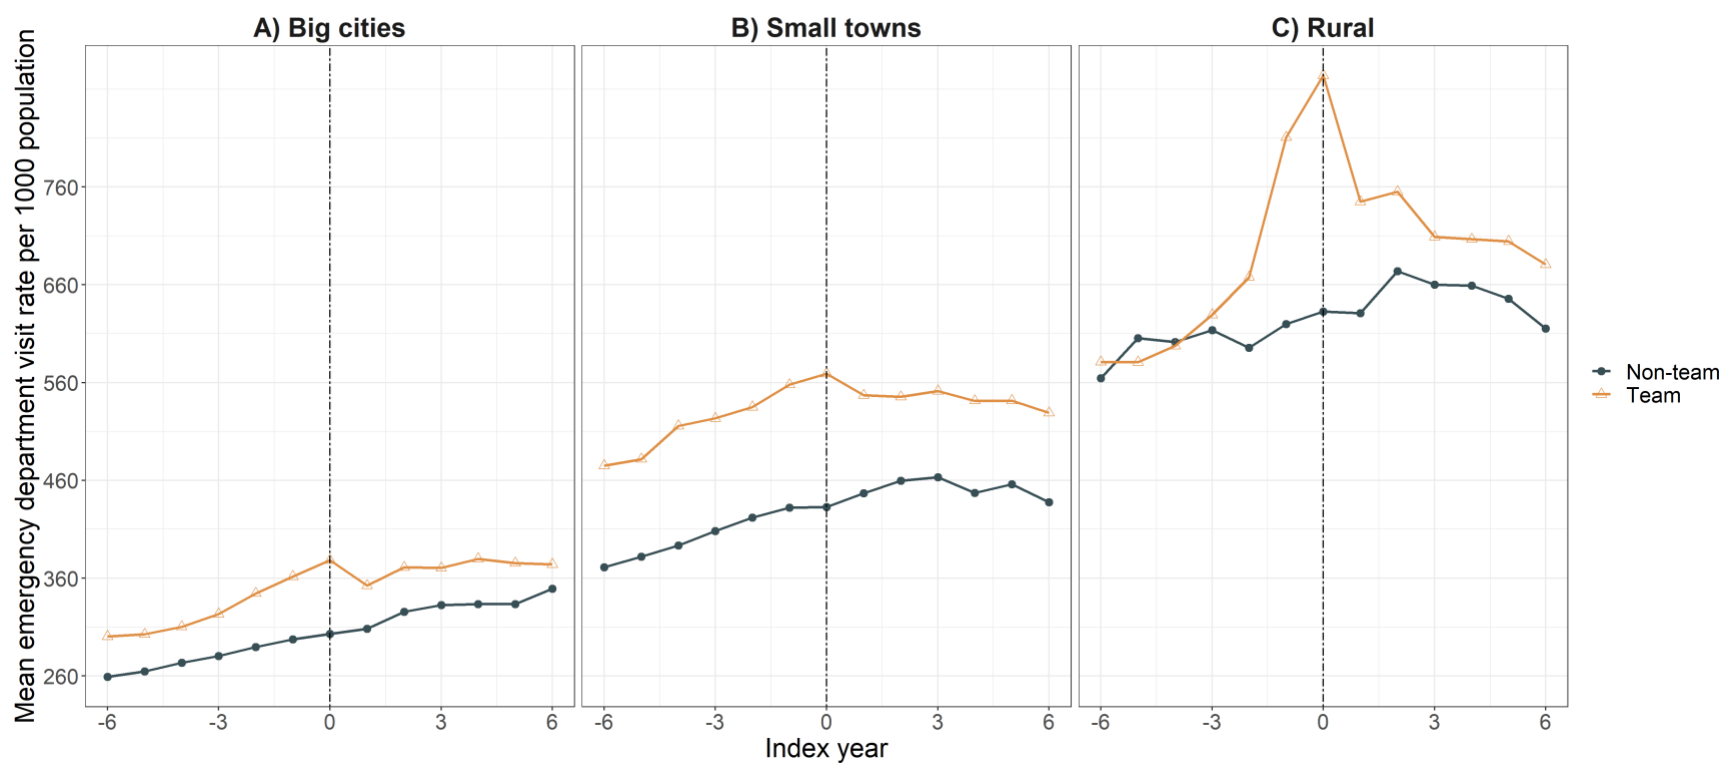

**Notes:** Patients whose physician transitioned to non-team capitation were matched to patients whose physician transitioned to team-based capitation by year of transition, age, sex, rurality, and local health region.
